# Supplementary material for: Transcriptional Biomarkers of Differentially Detectable Mycobacterium tuberculosis in Patient Sputum
Source: PubMed Central journal article supplement (PMC9765512; doi:10.1128/mbio.02701-22), 2022-11-03

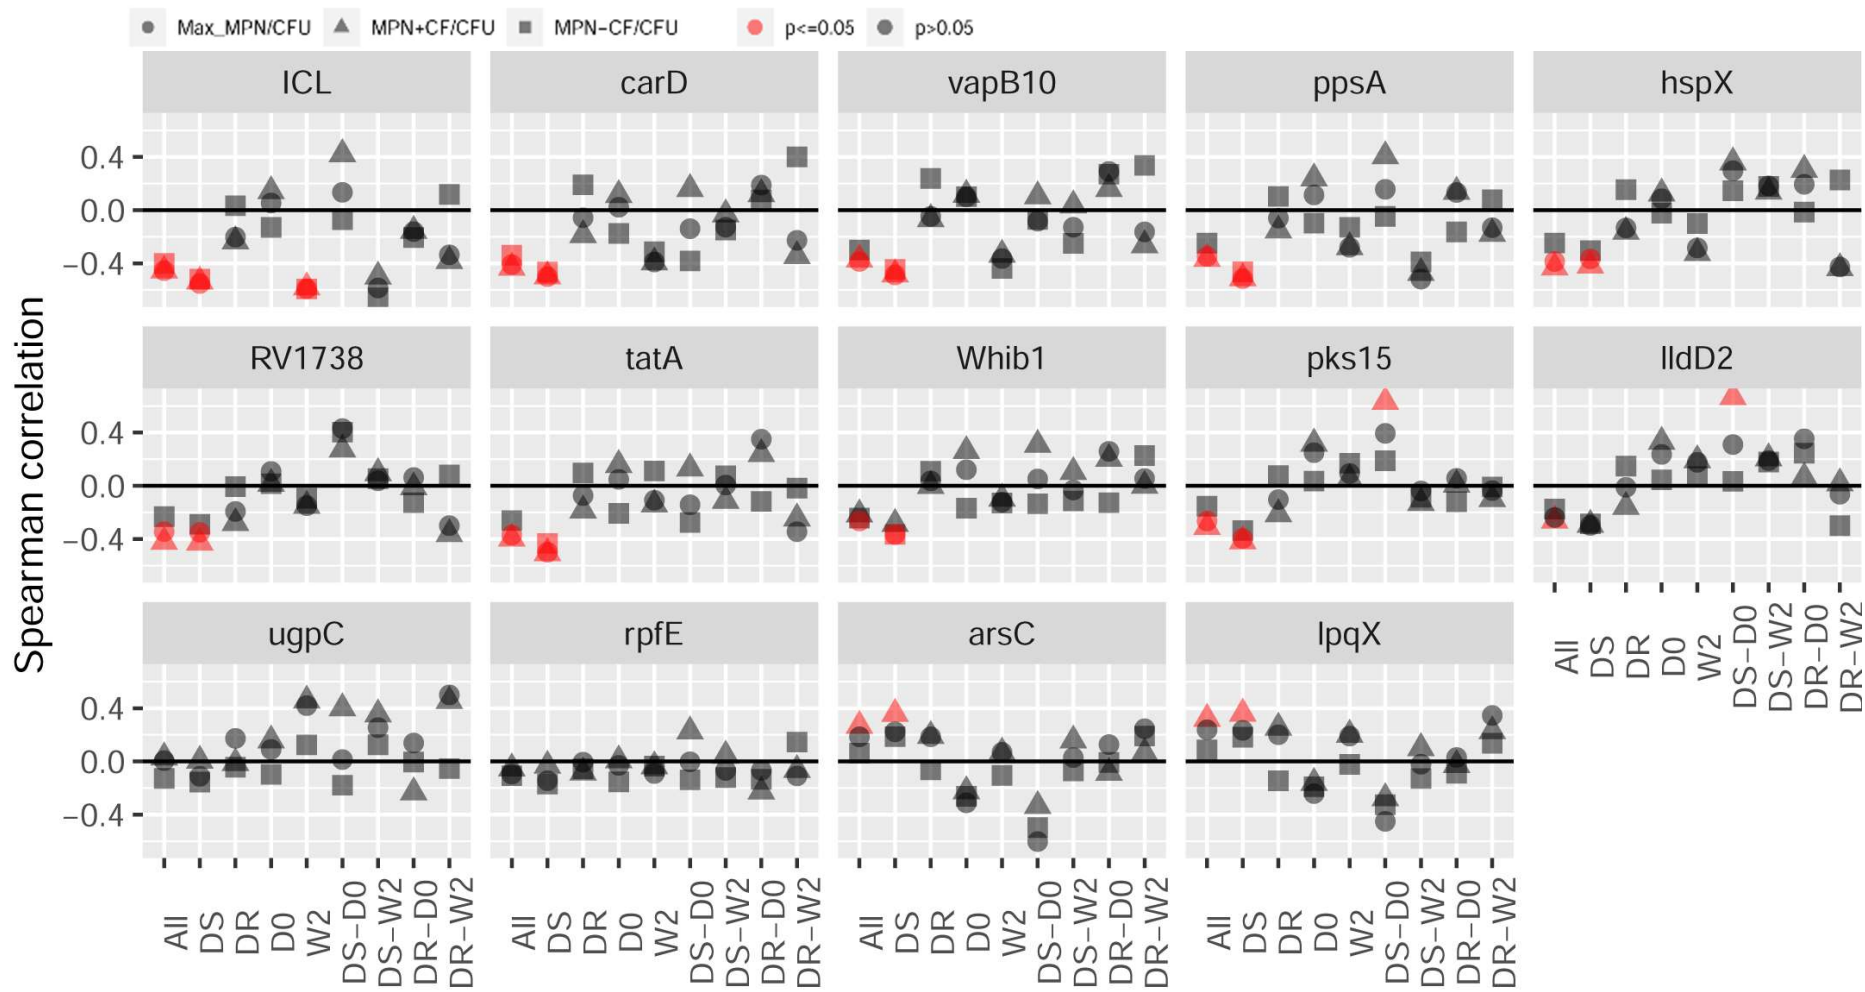

All Samples

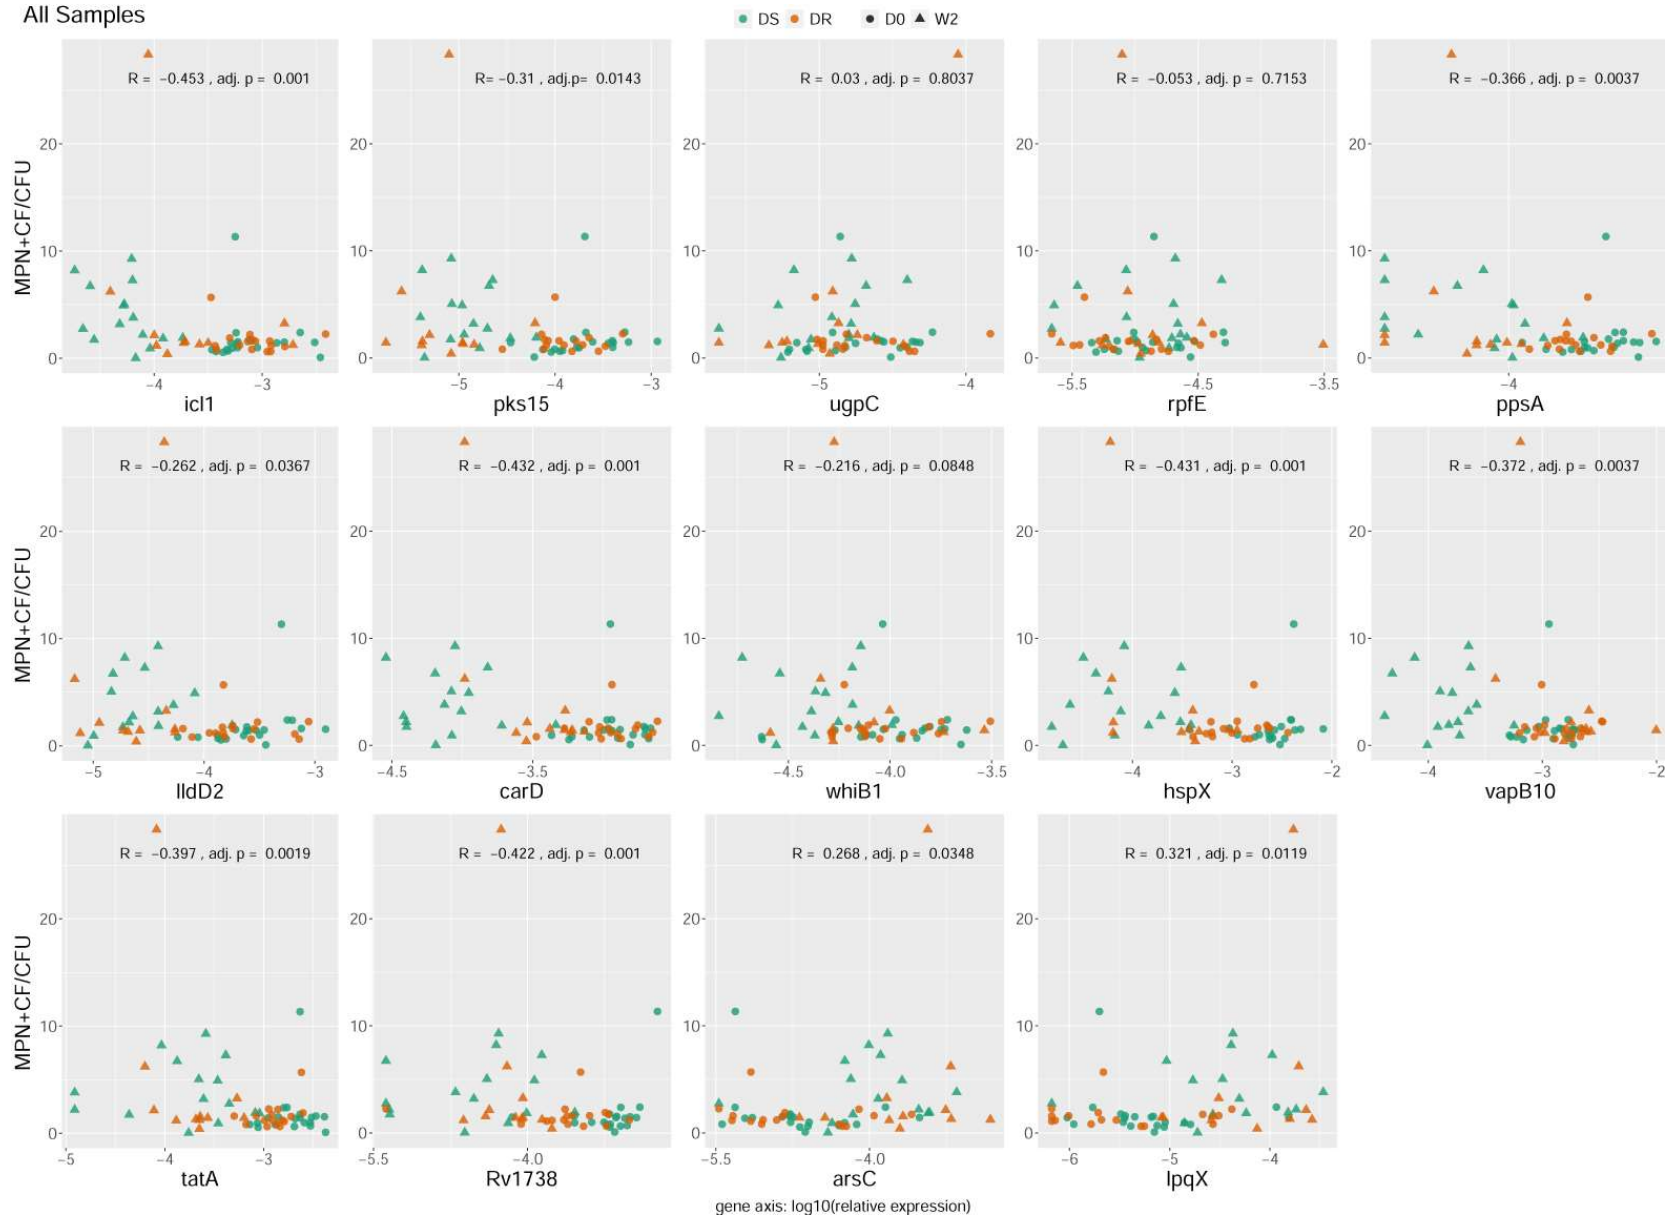

All Samples

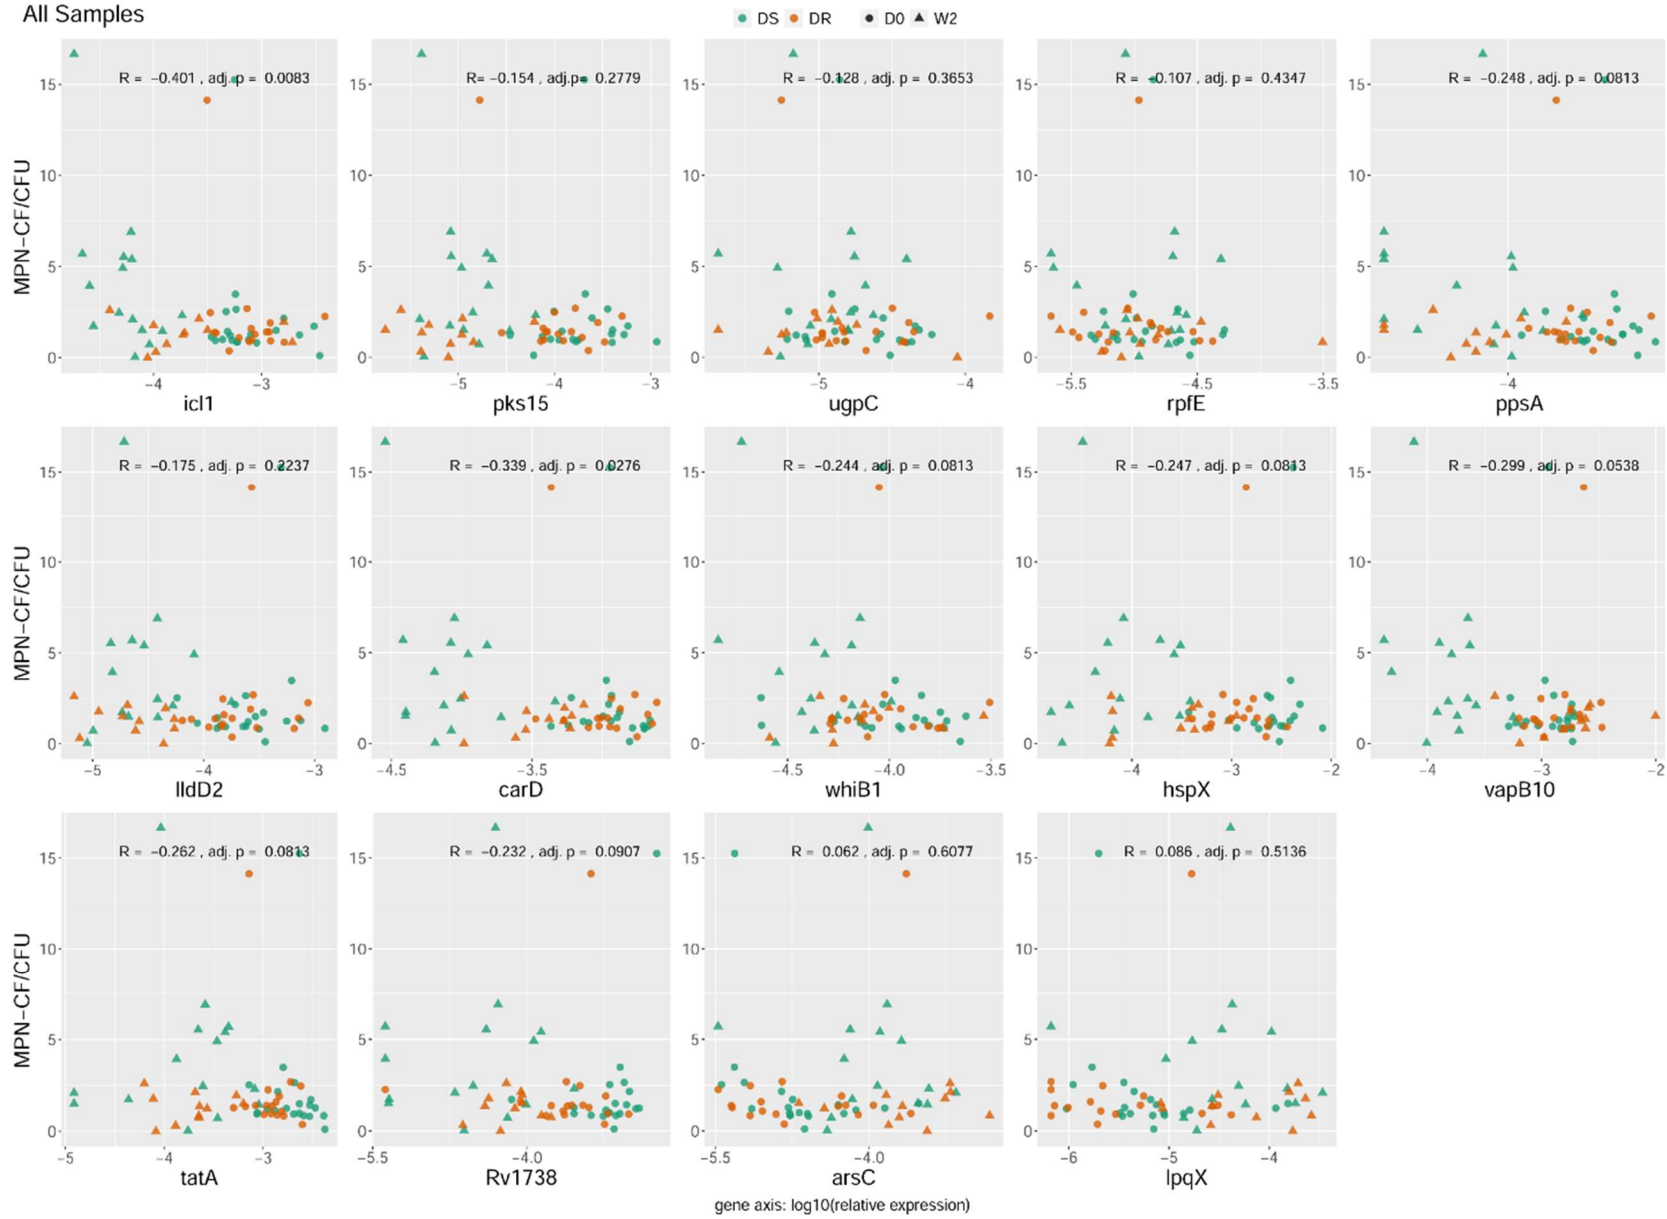

All Samples

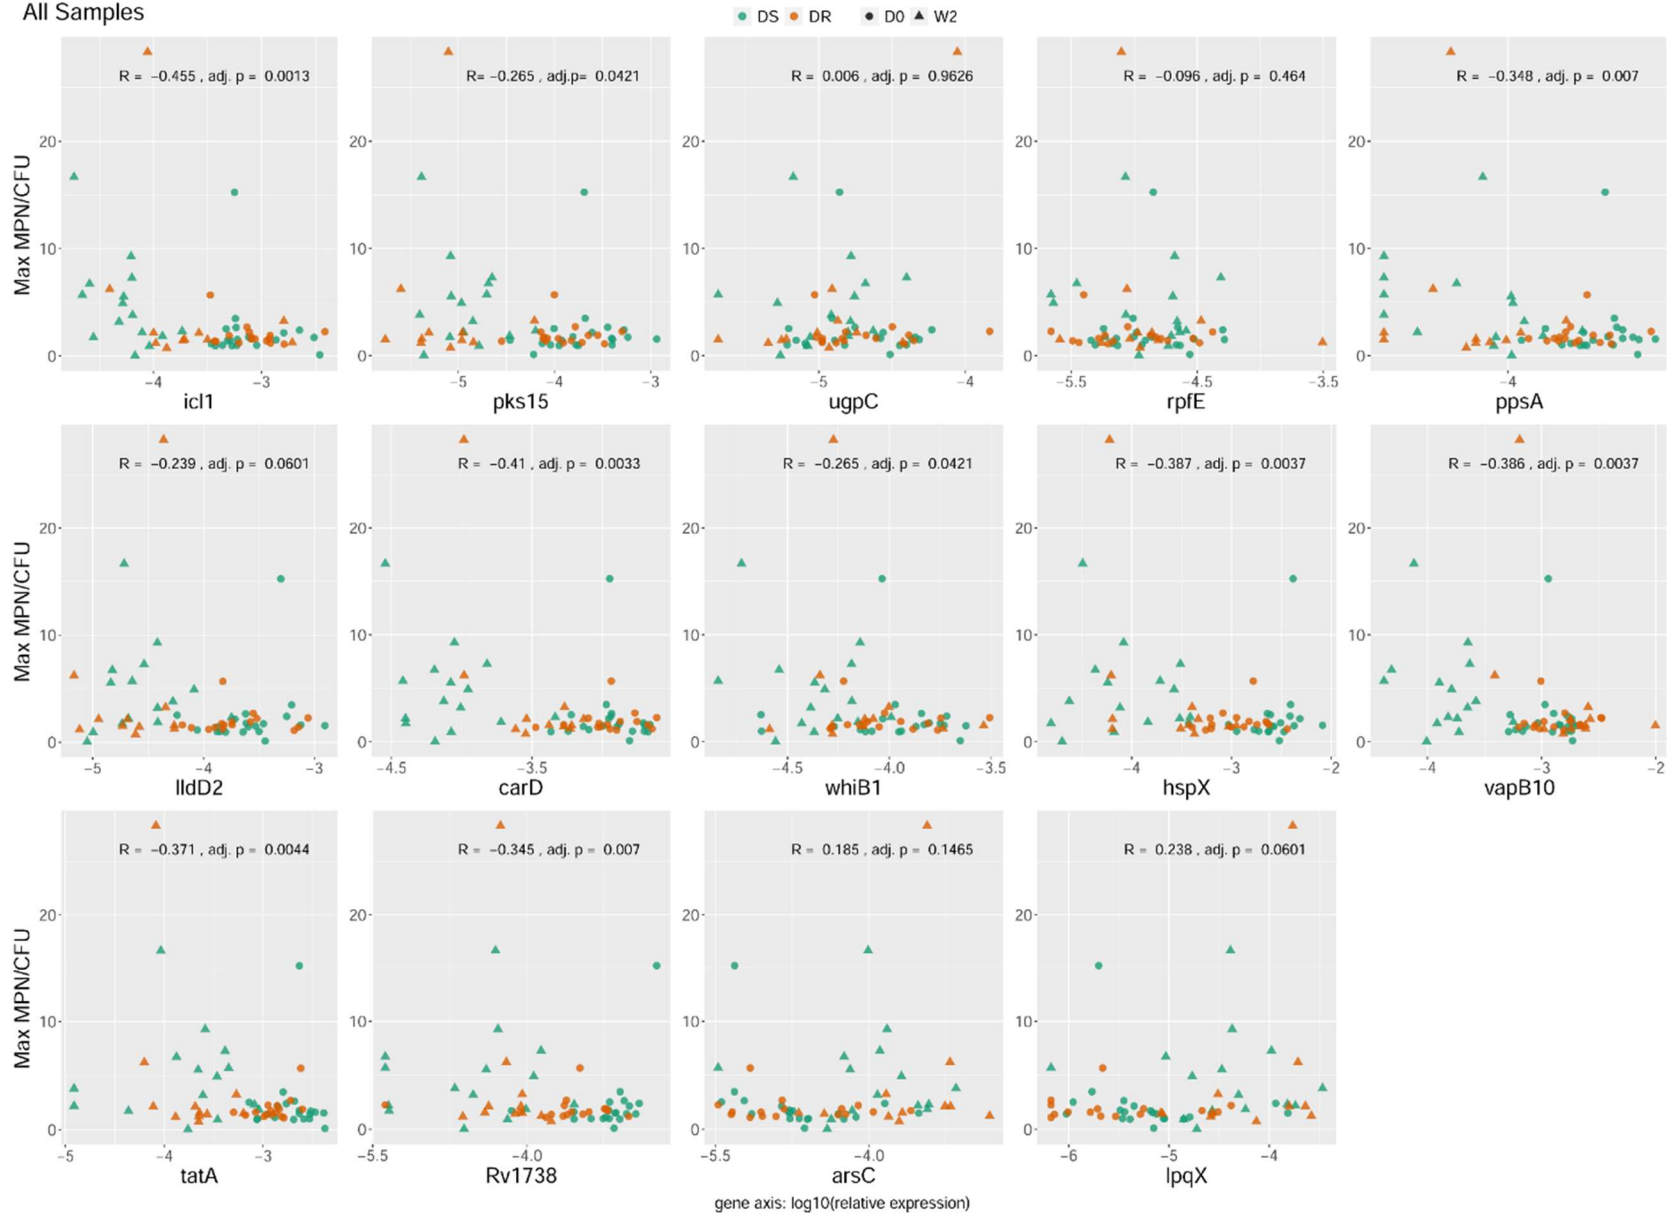

Drug Sensitive

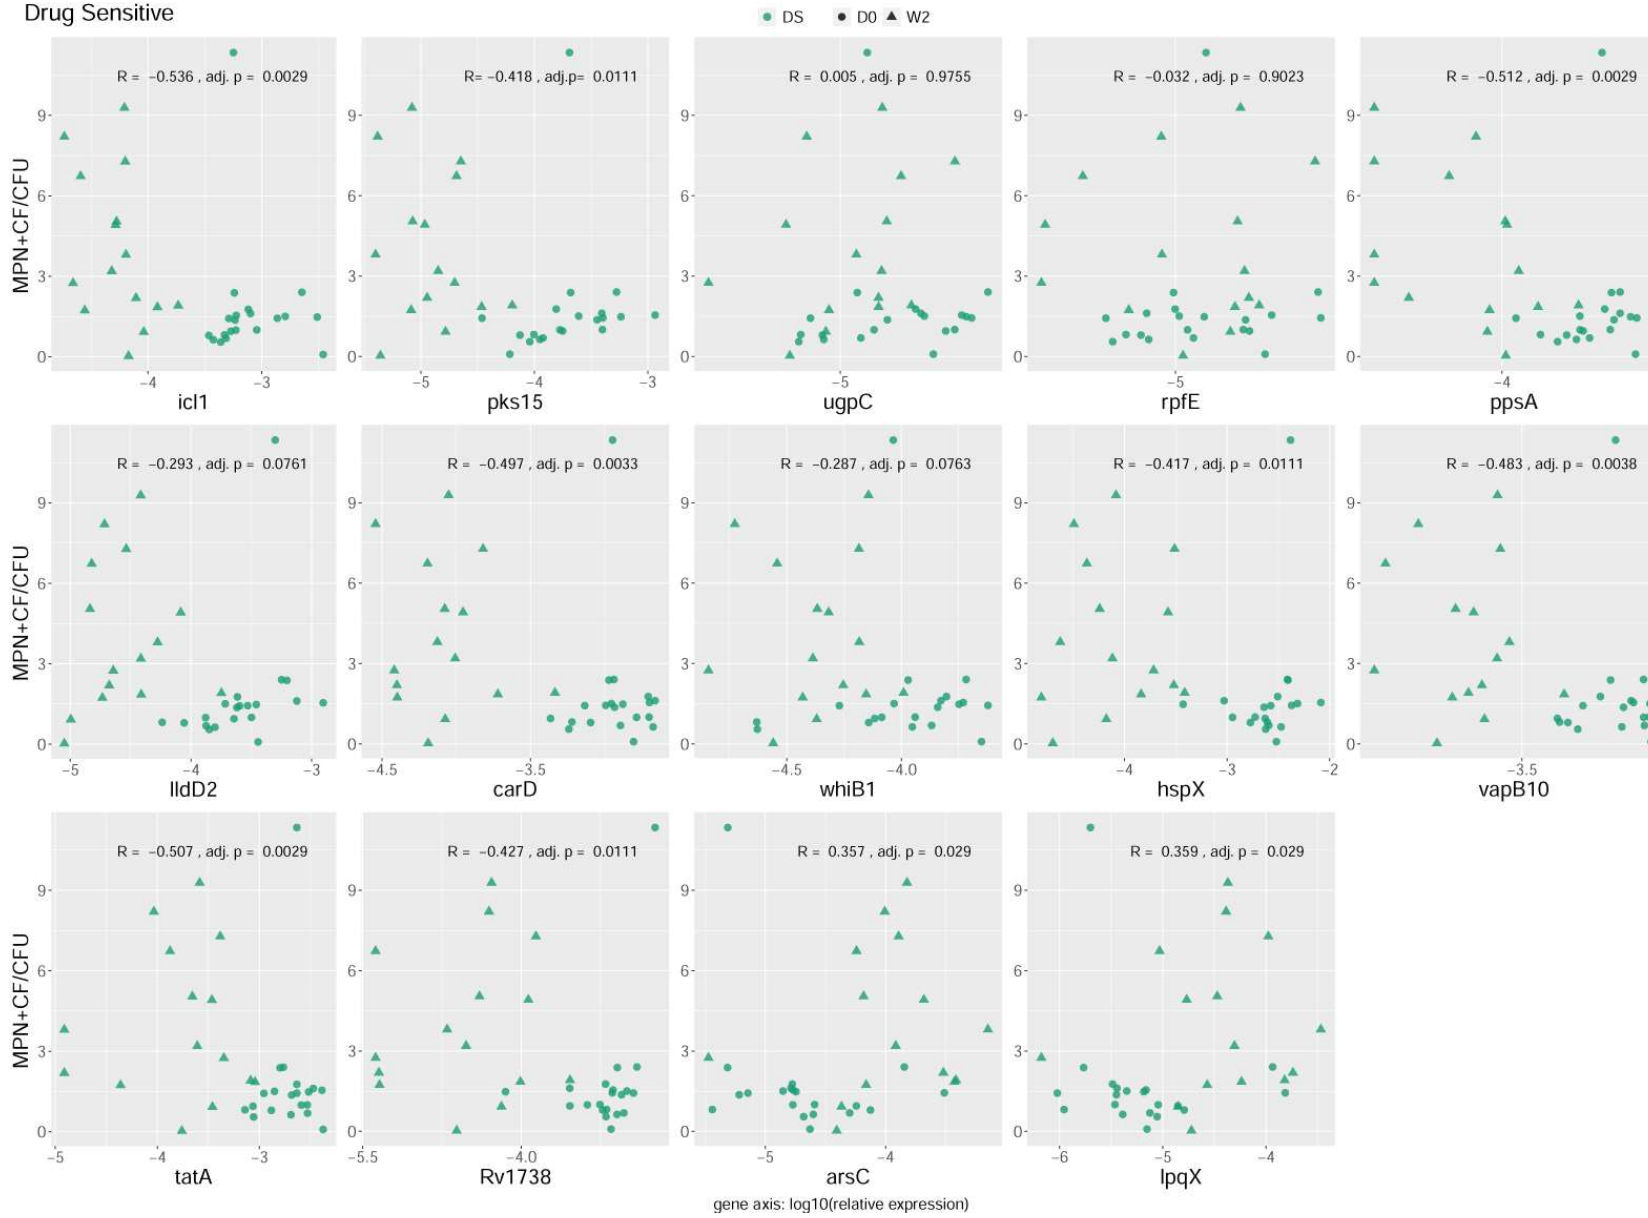

# Drug Sensitive

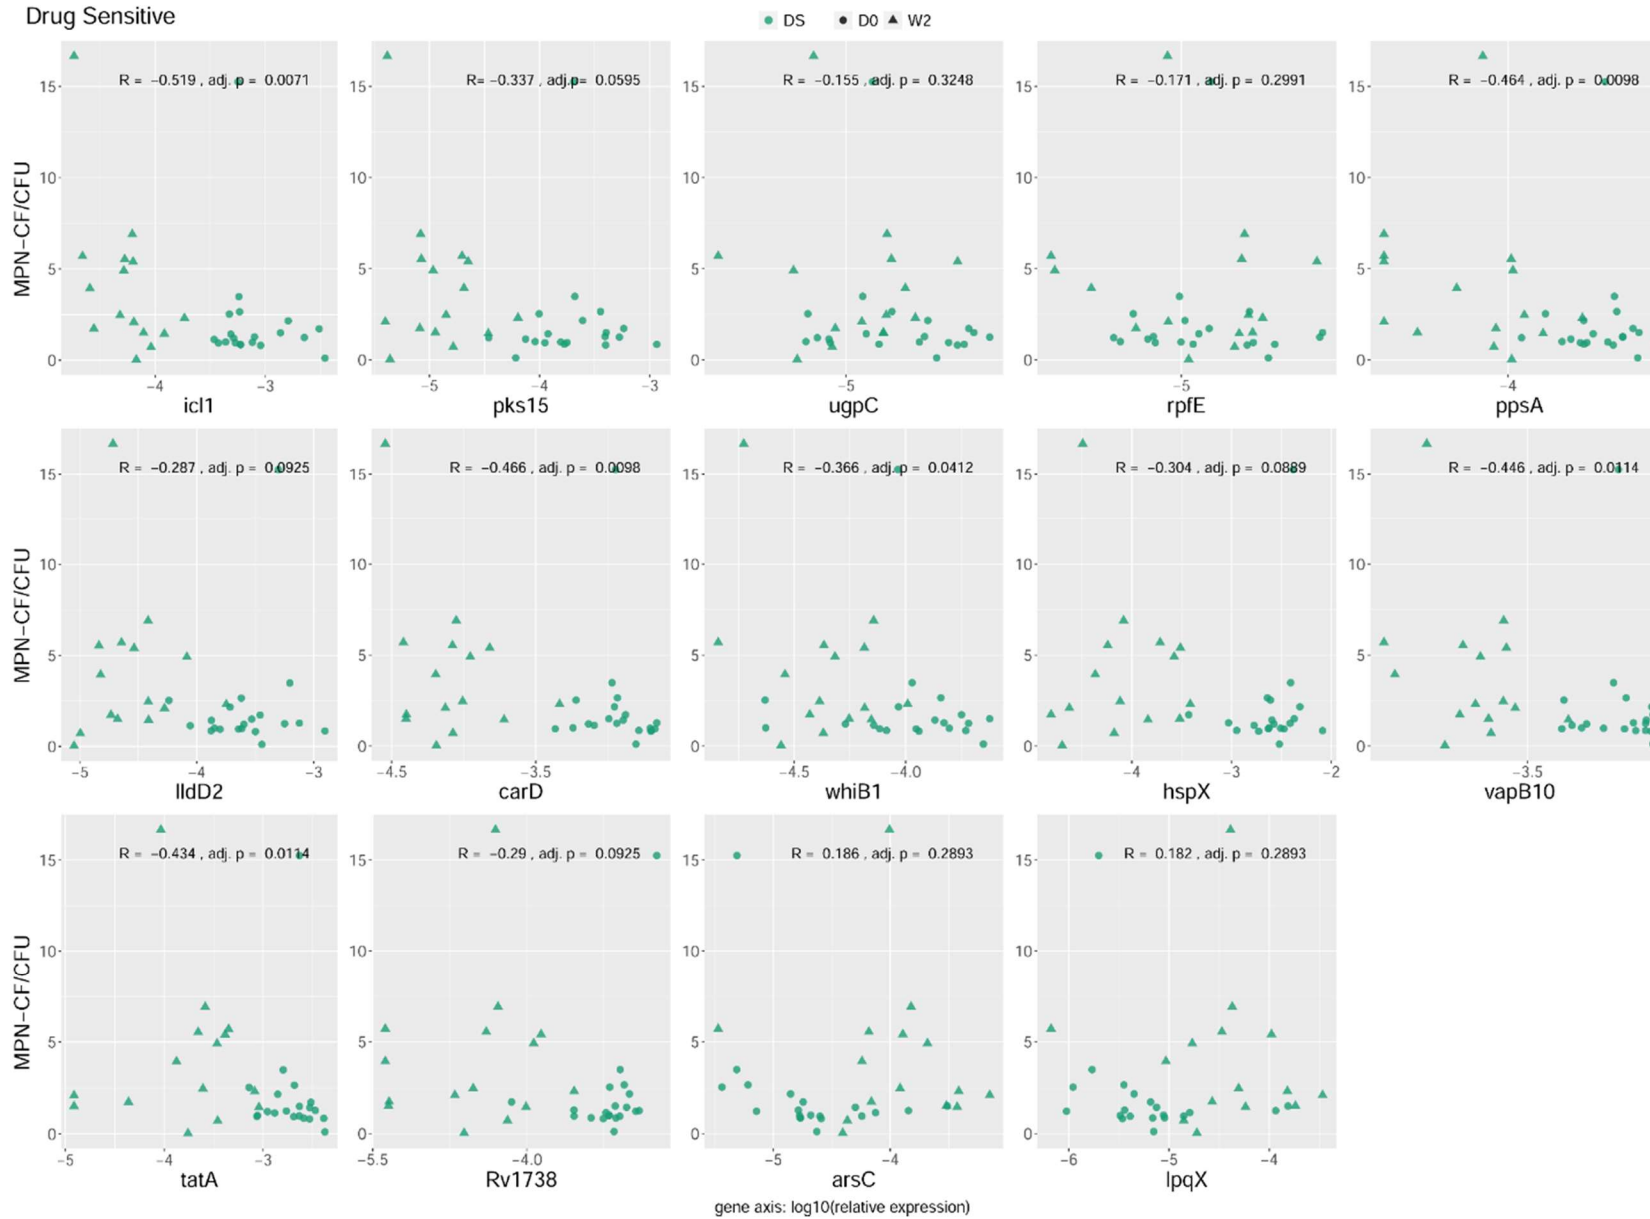

# Drug Sensitive

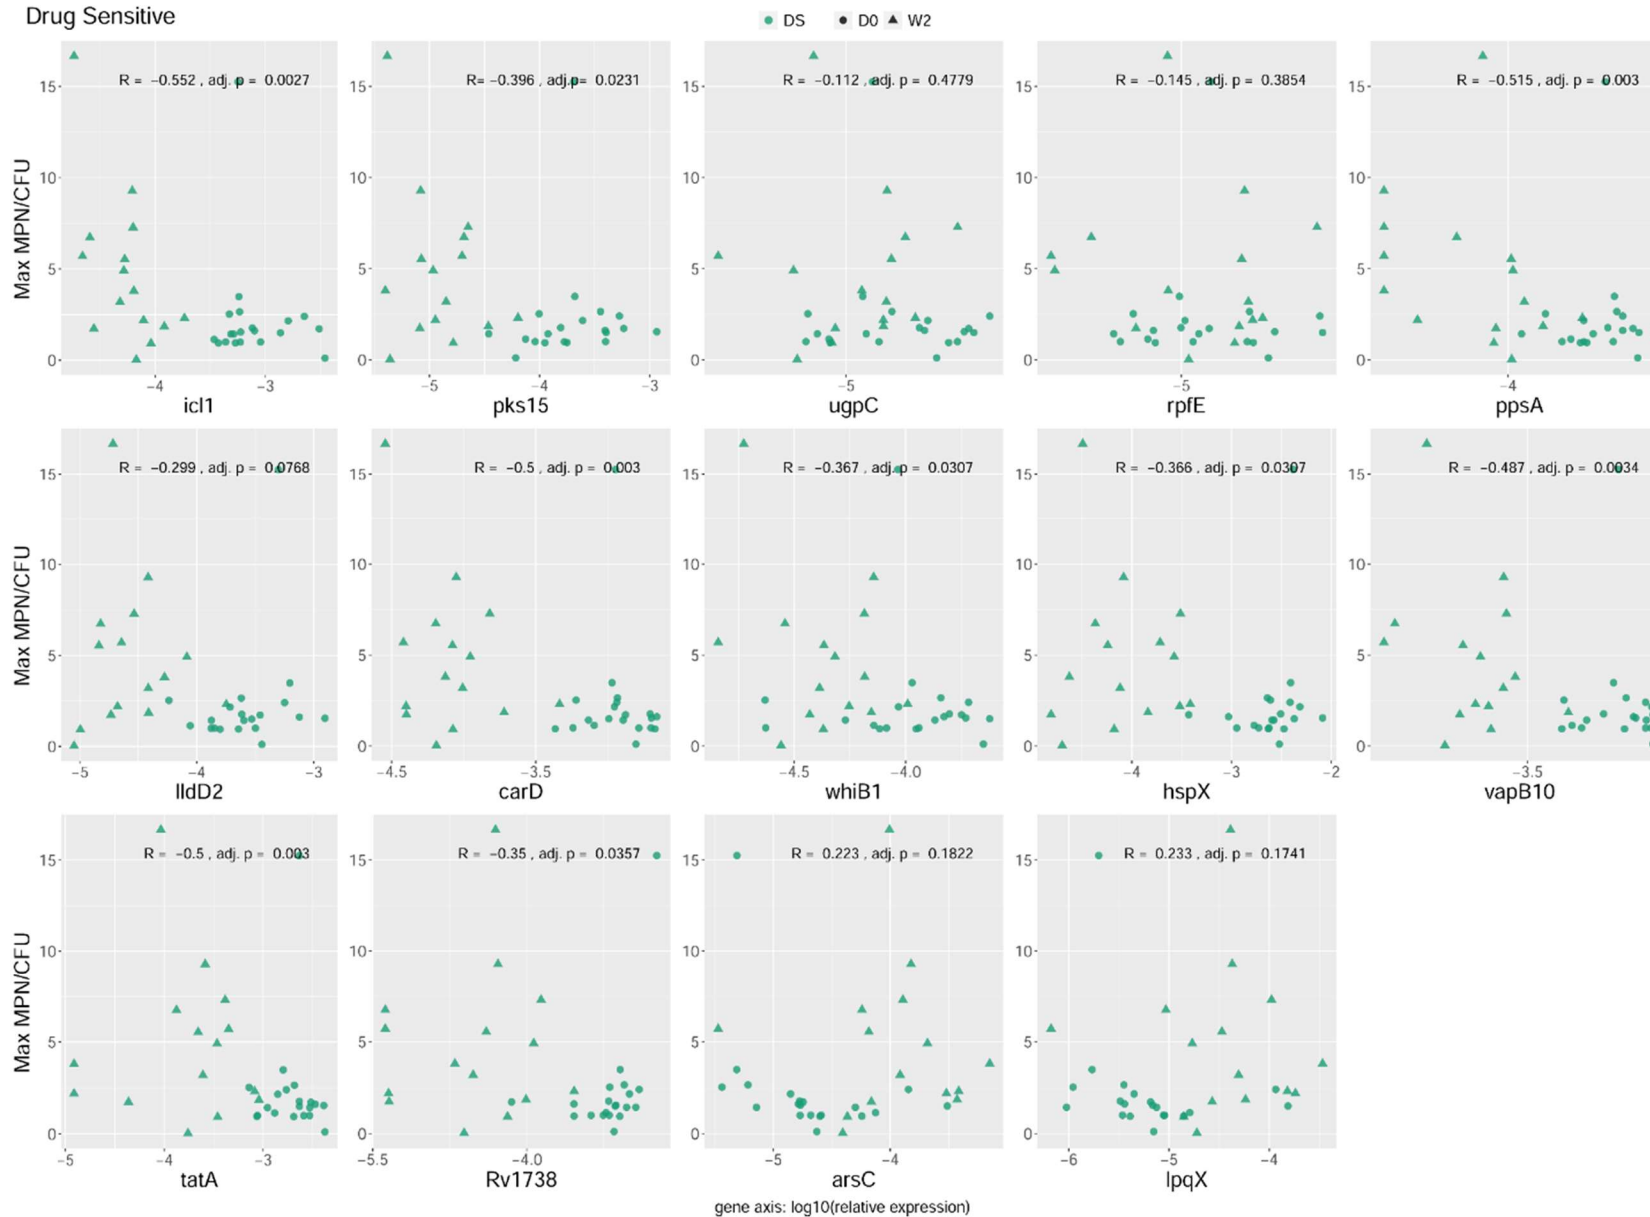

# Drug Resistant

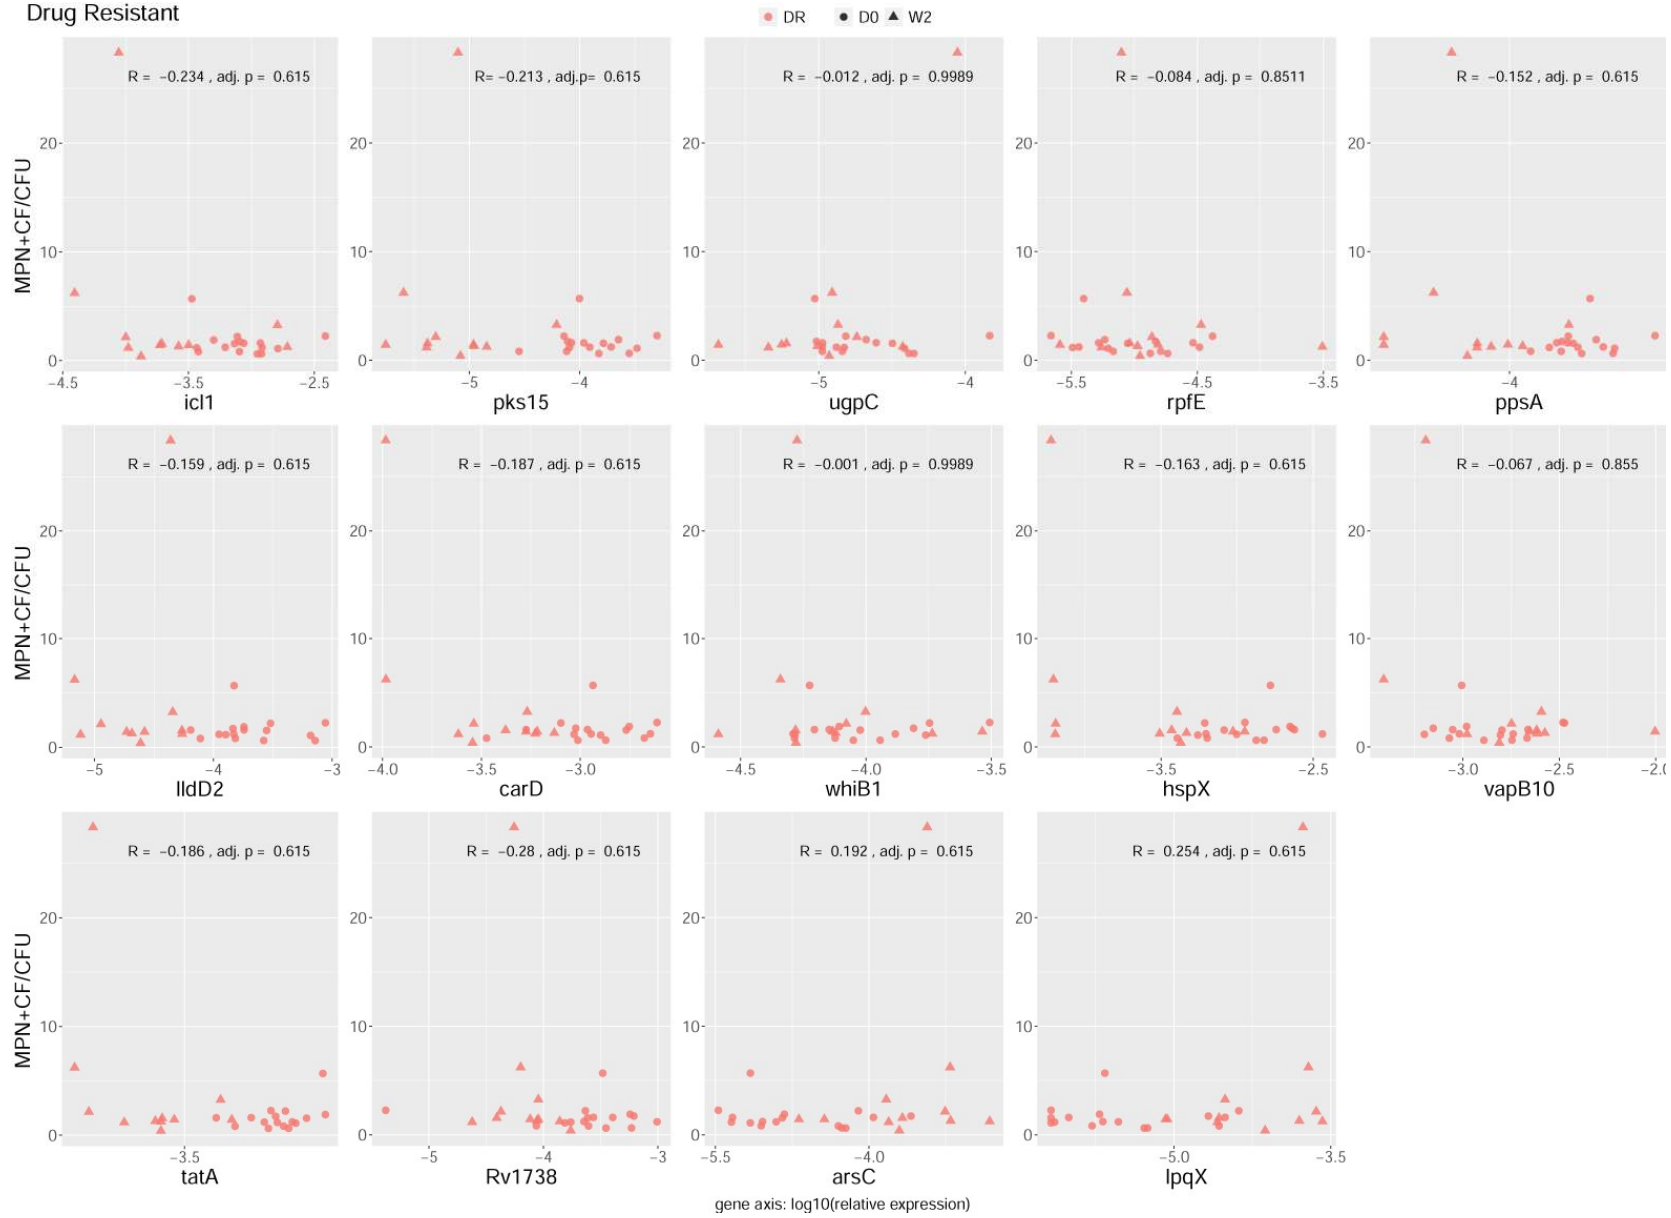



# Drug Resistant

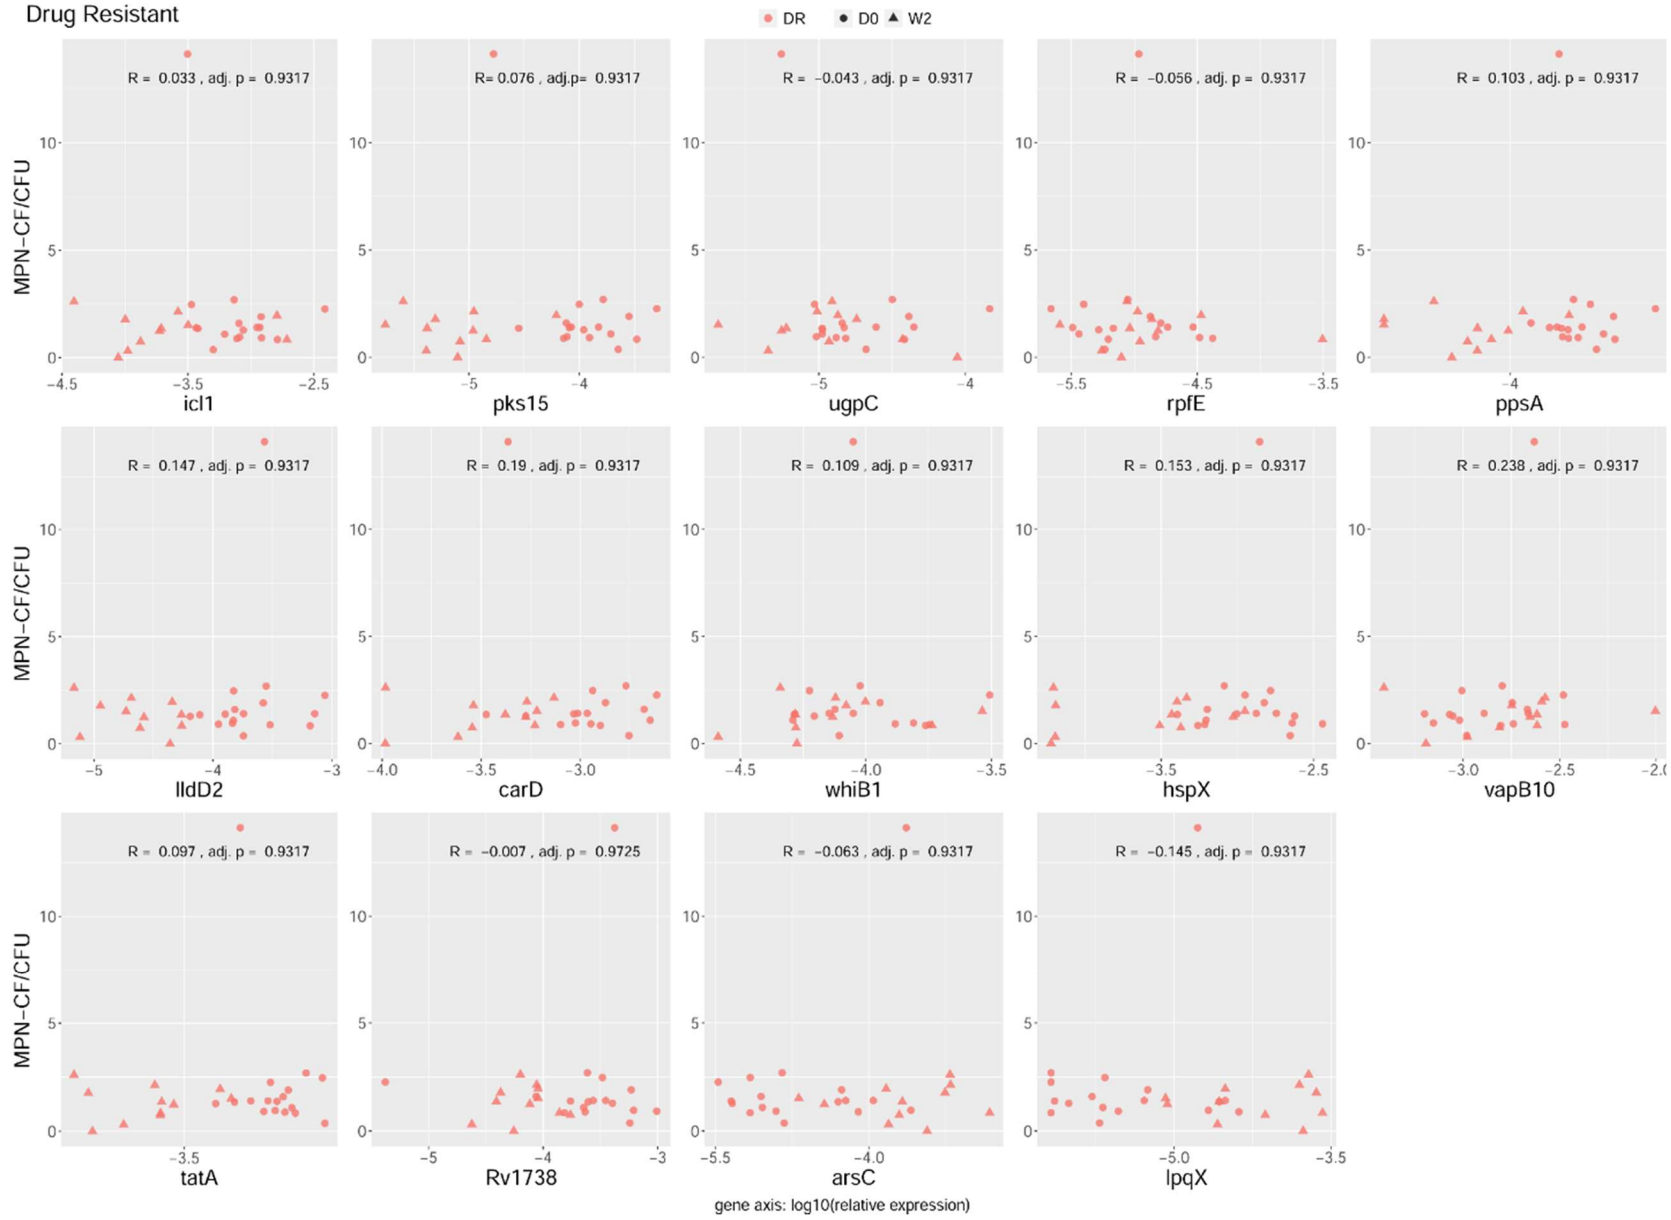

# Drug Resistant

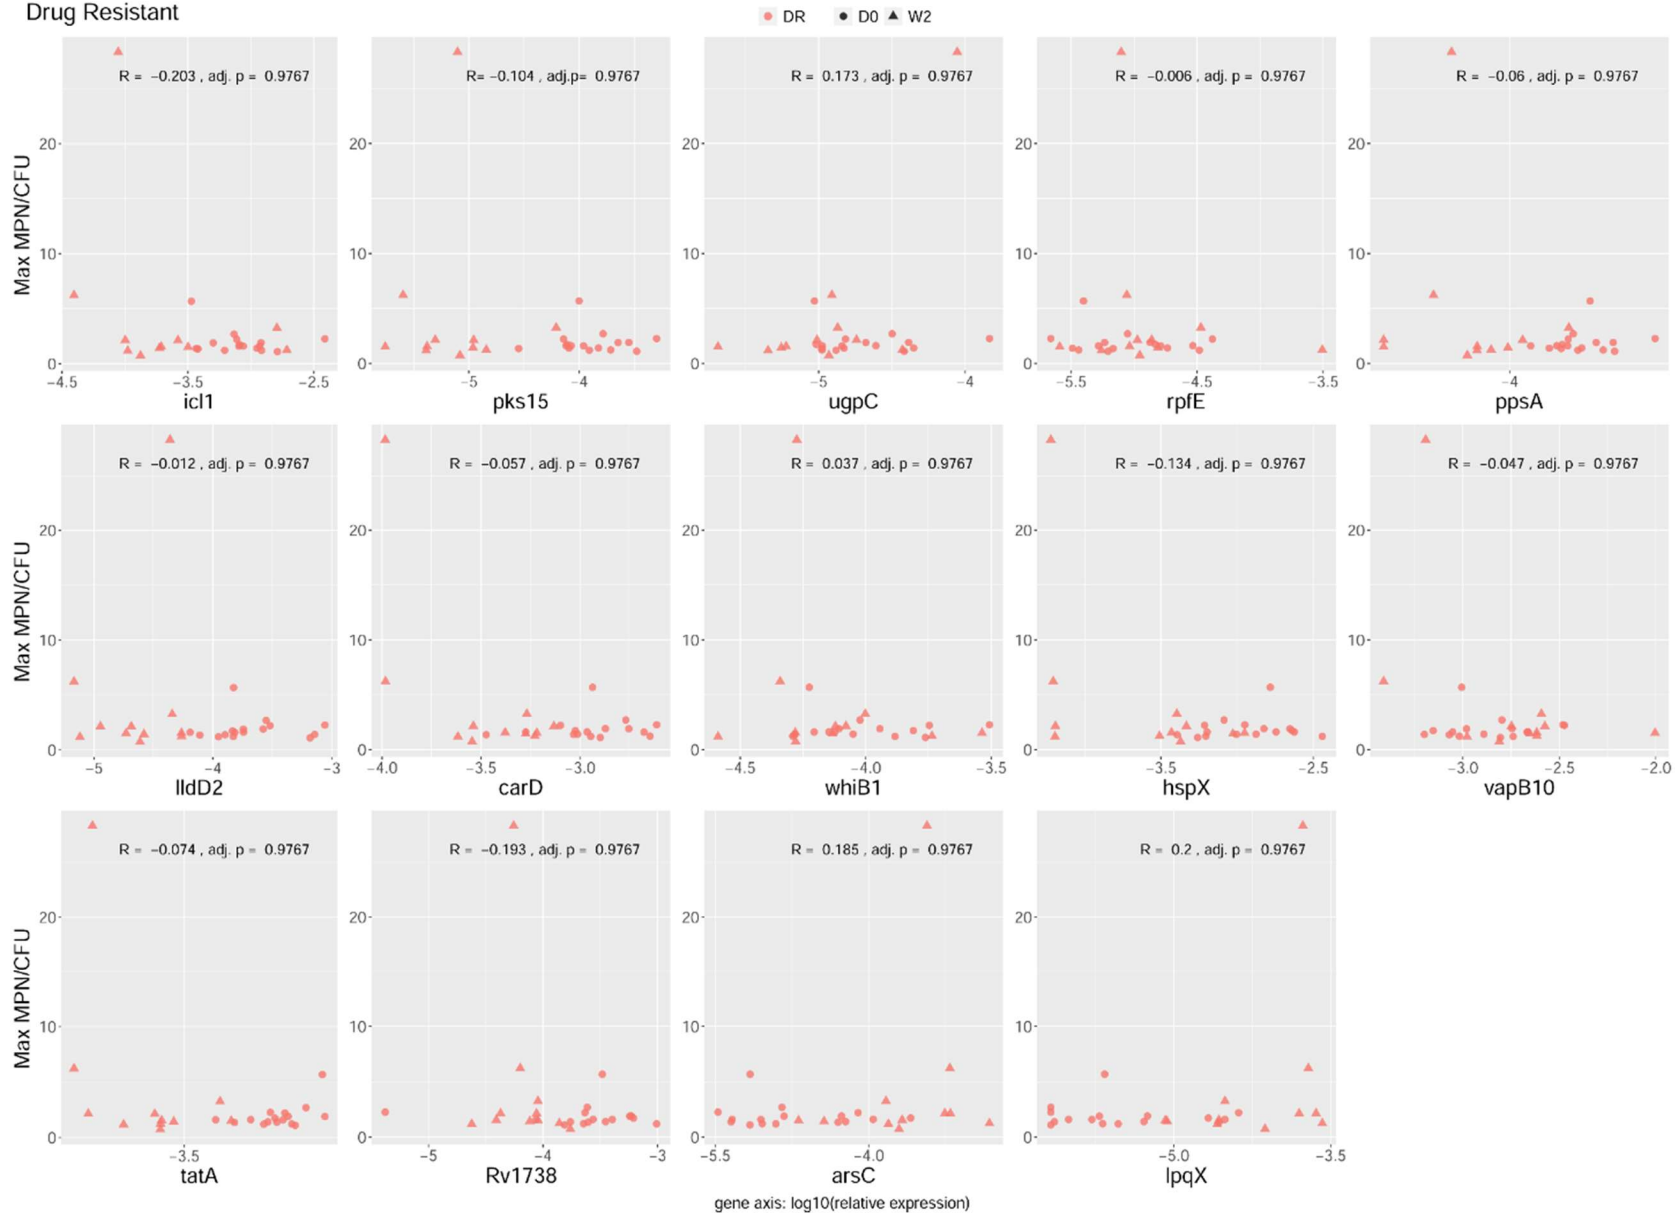

Before Treatment

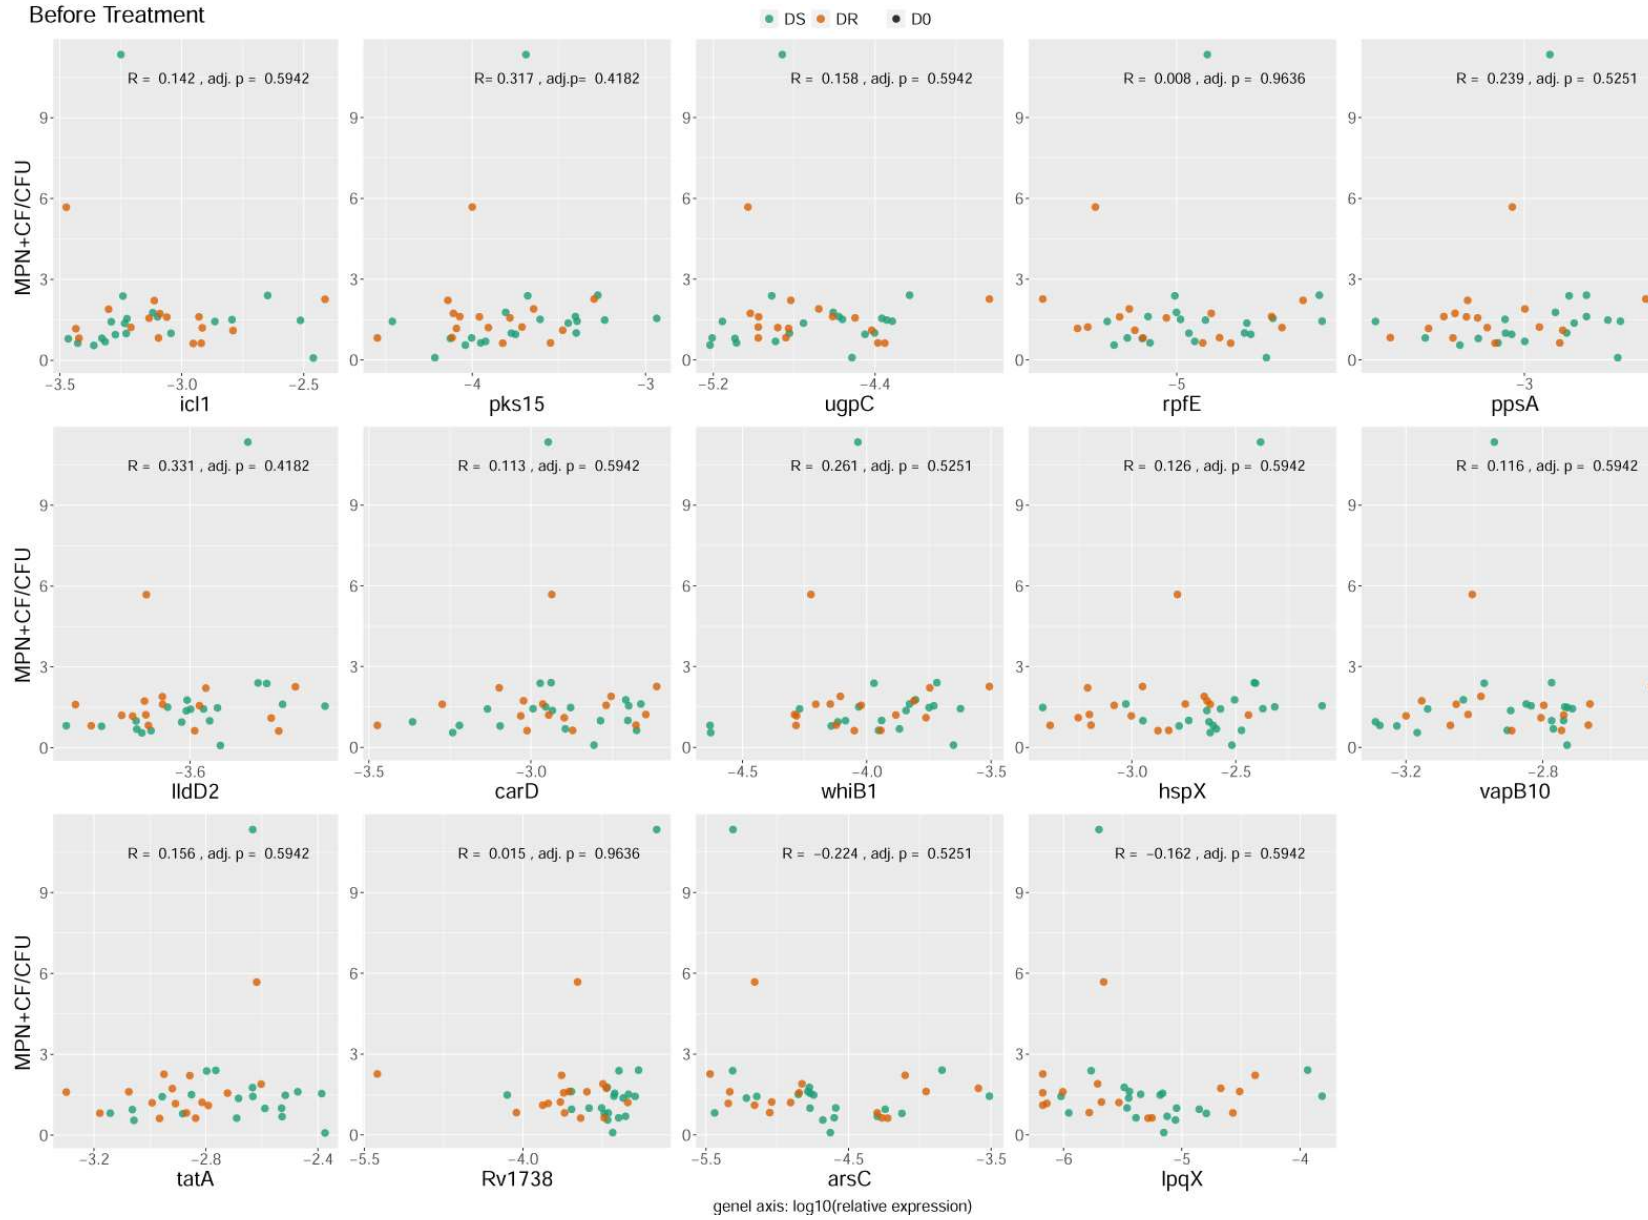

Before Treatment

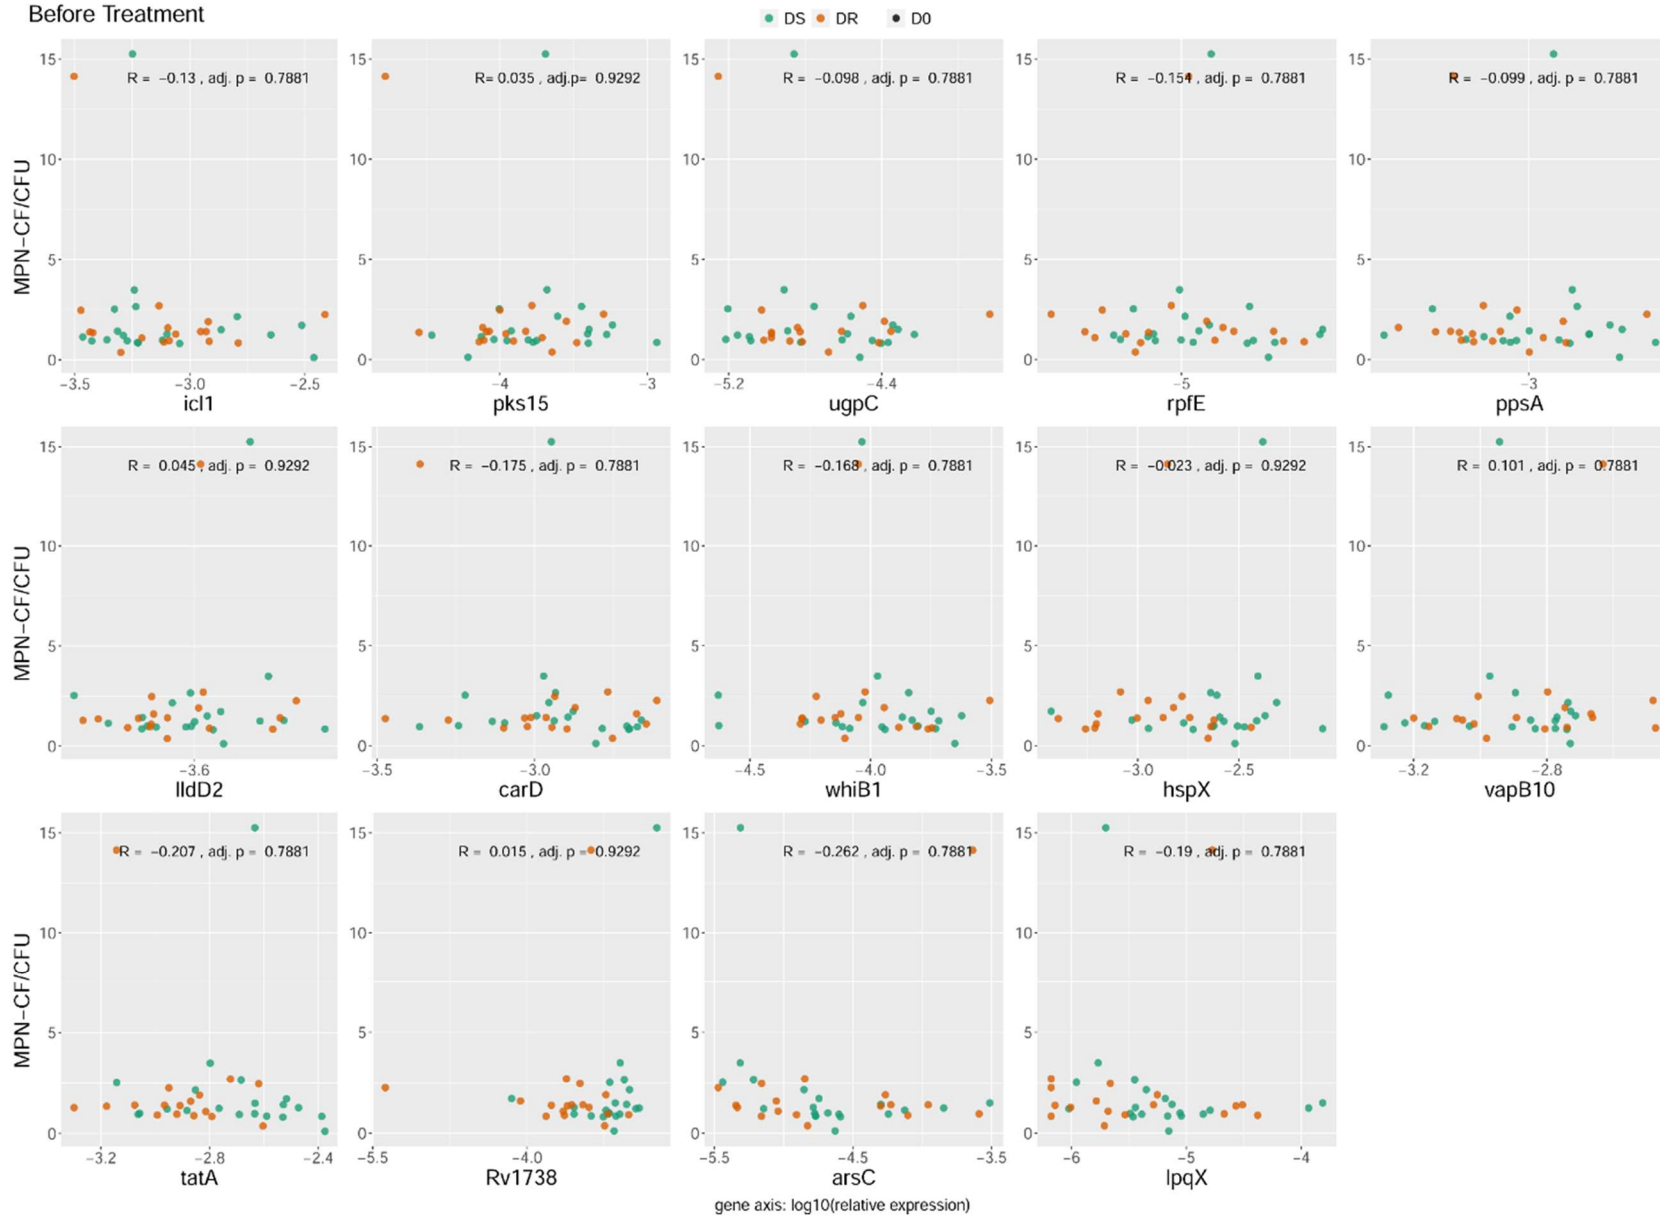

Before Treatment

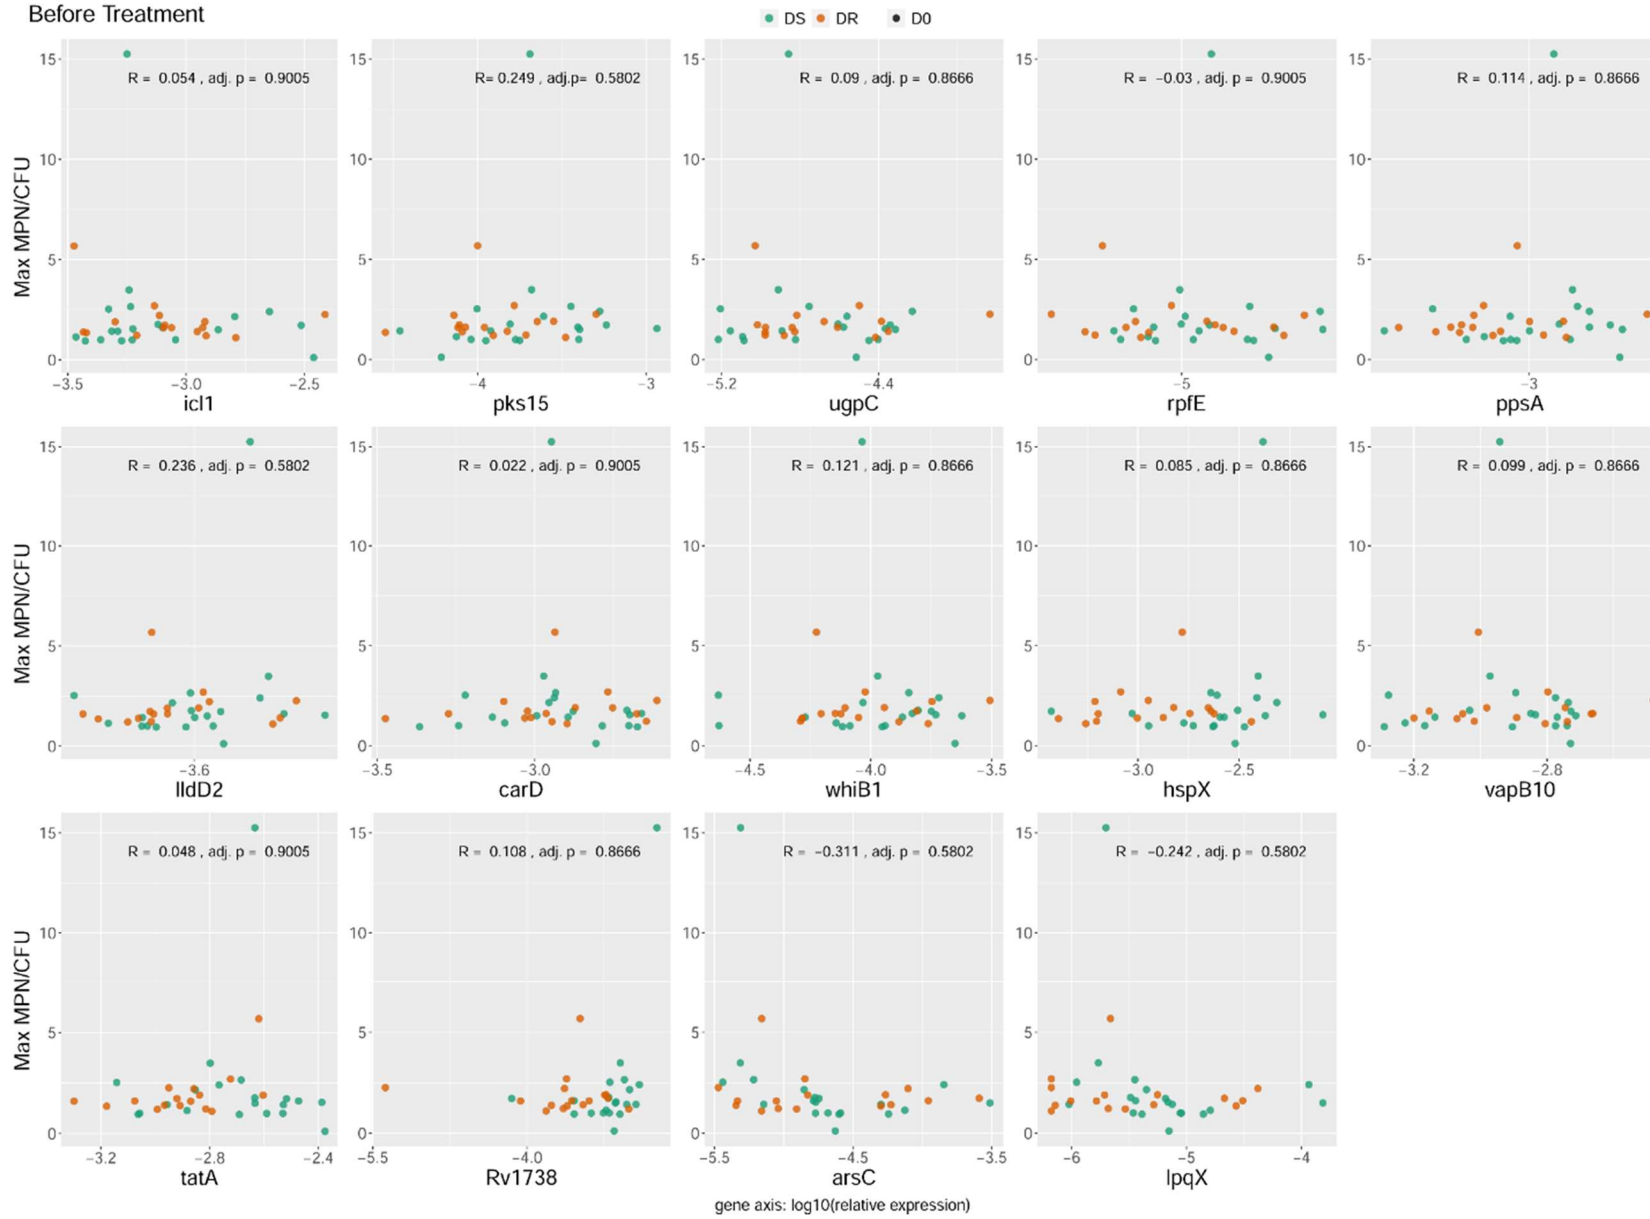

After Treatment

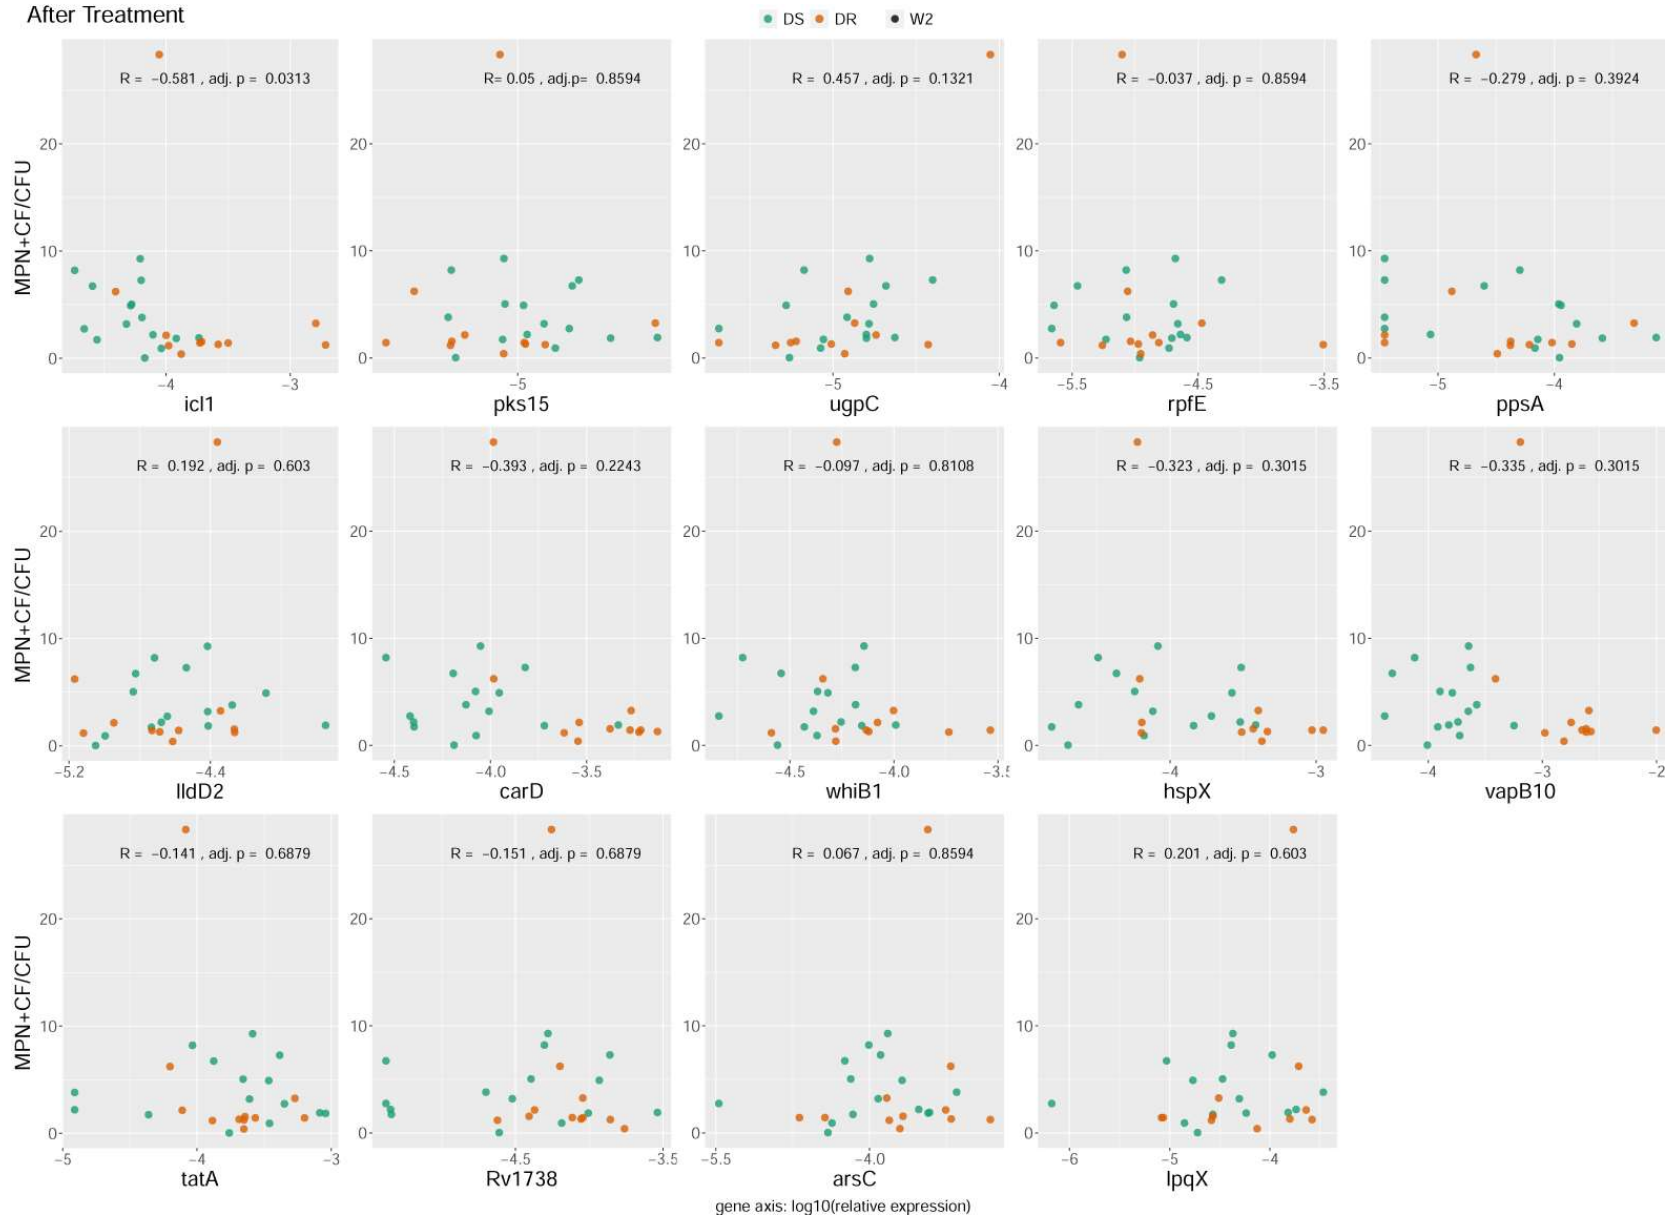

After Treatment

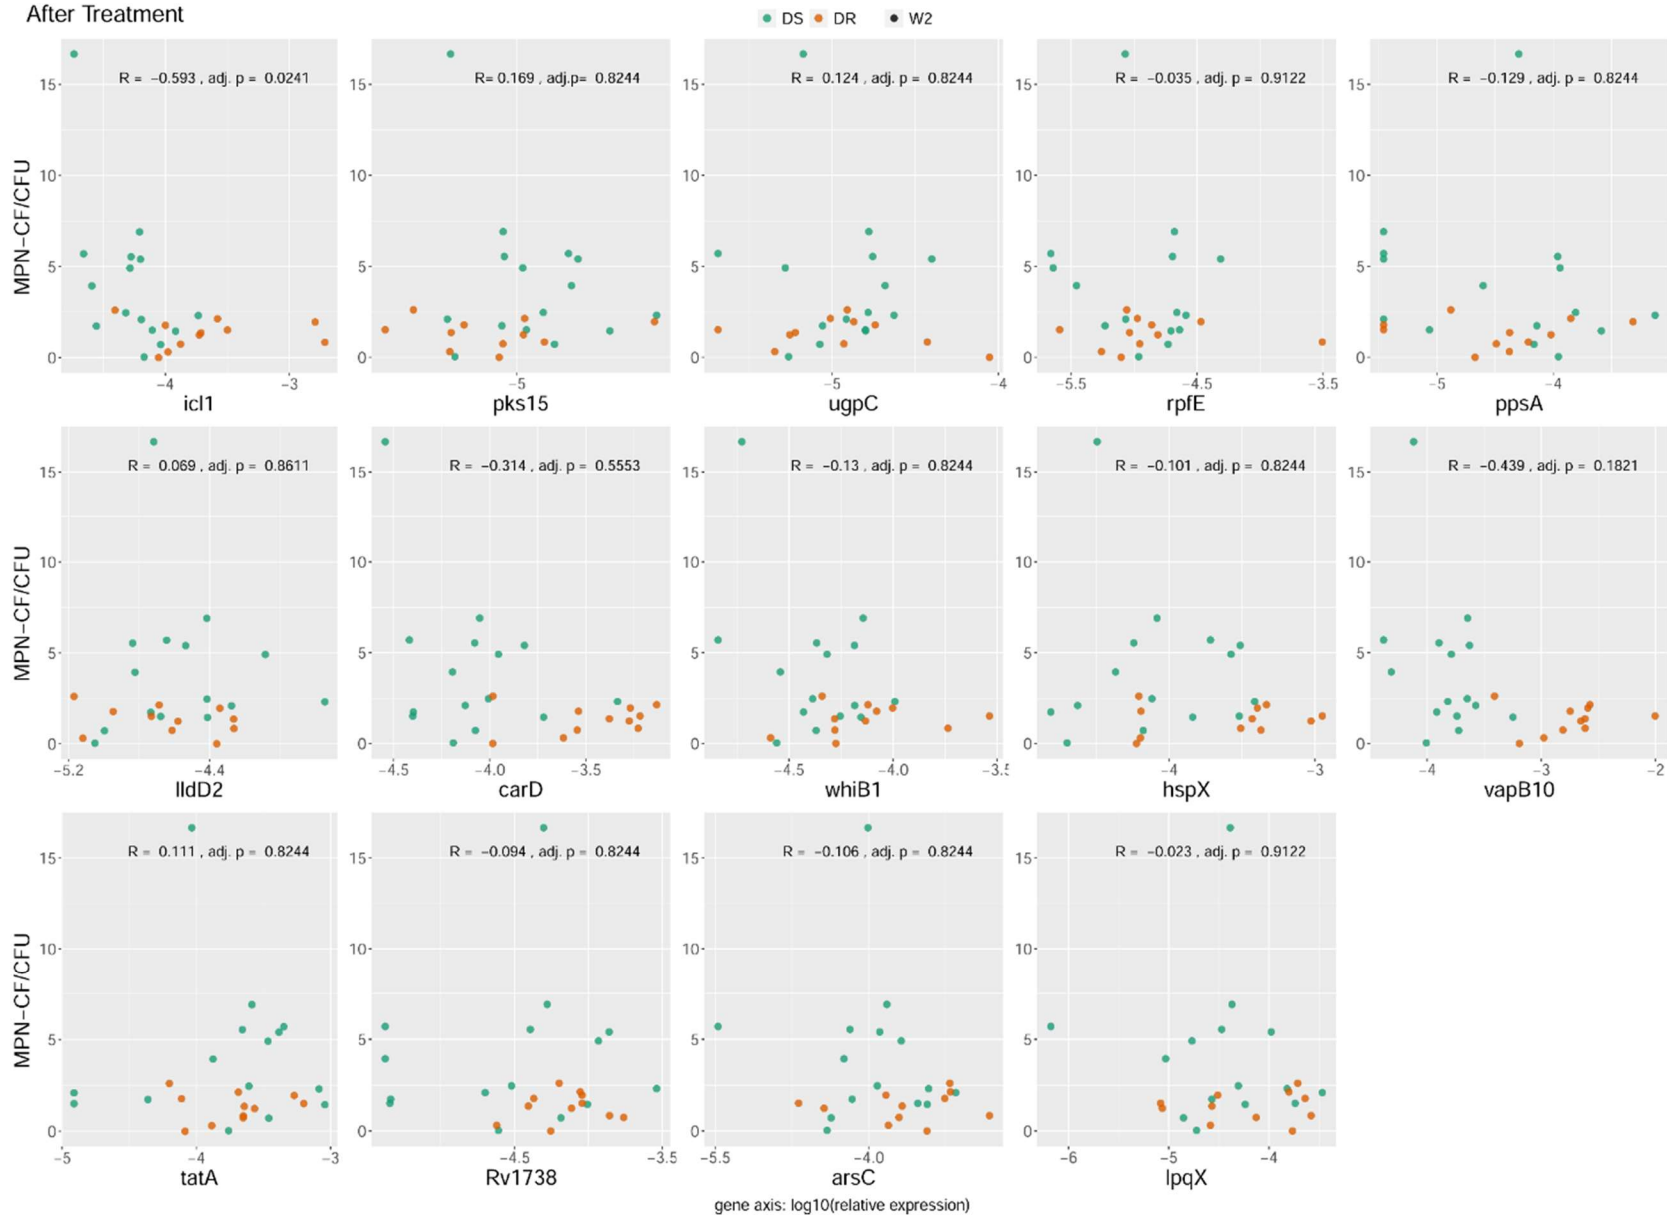

After Treatment

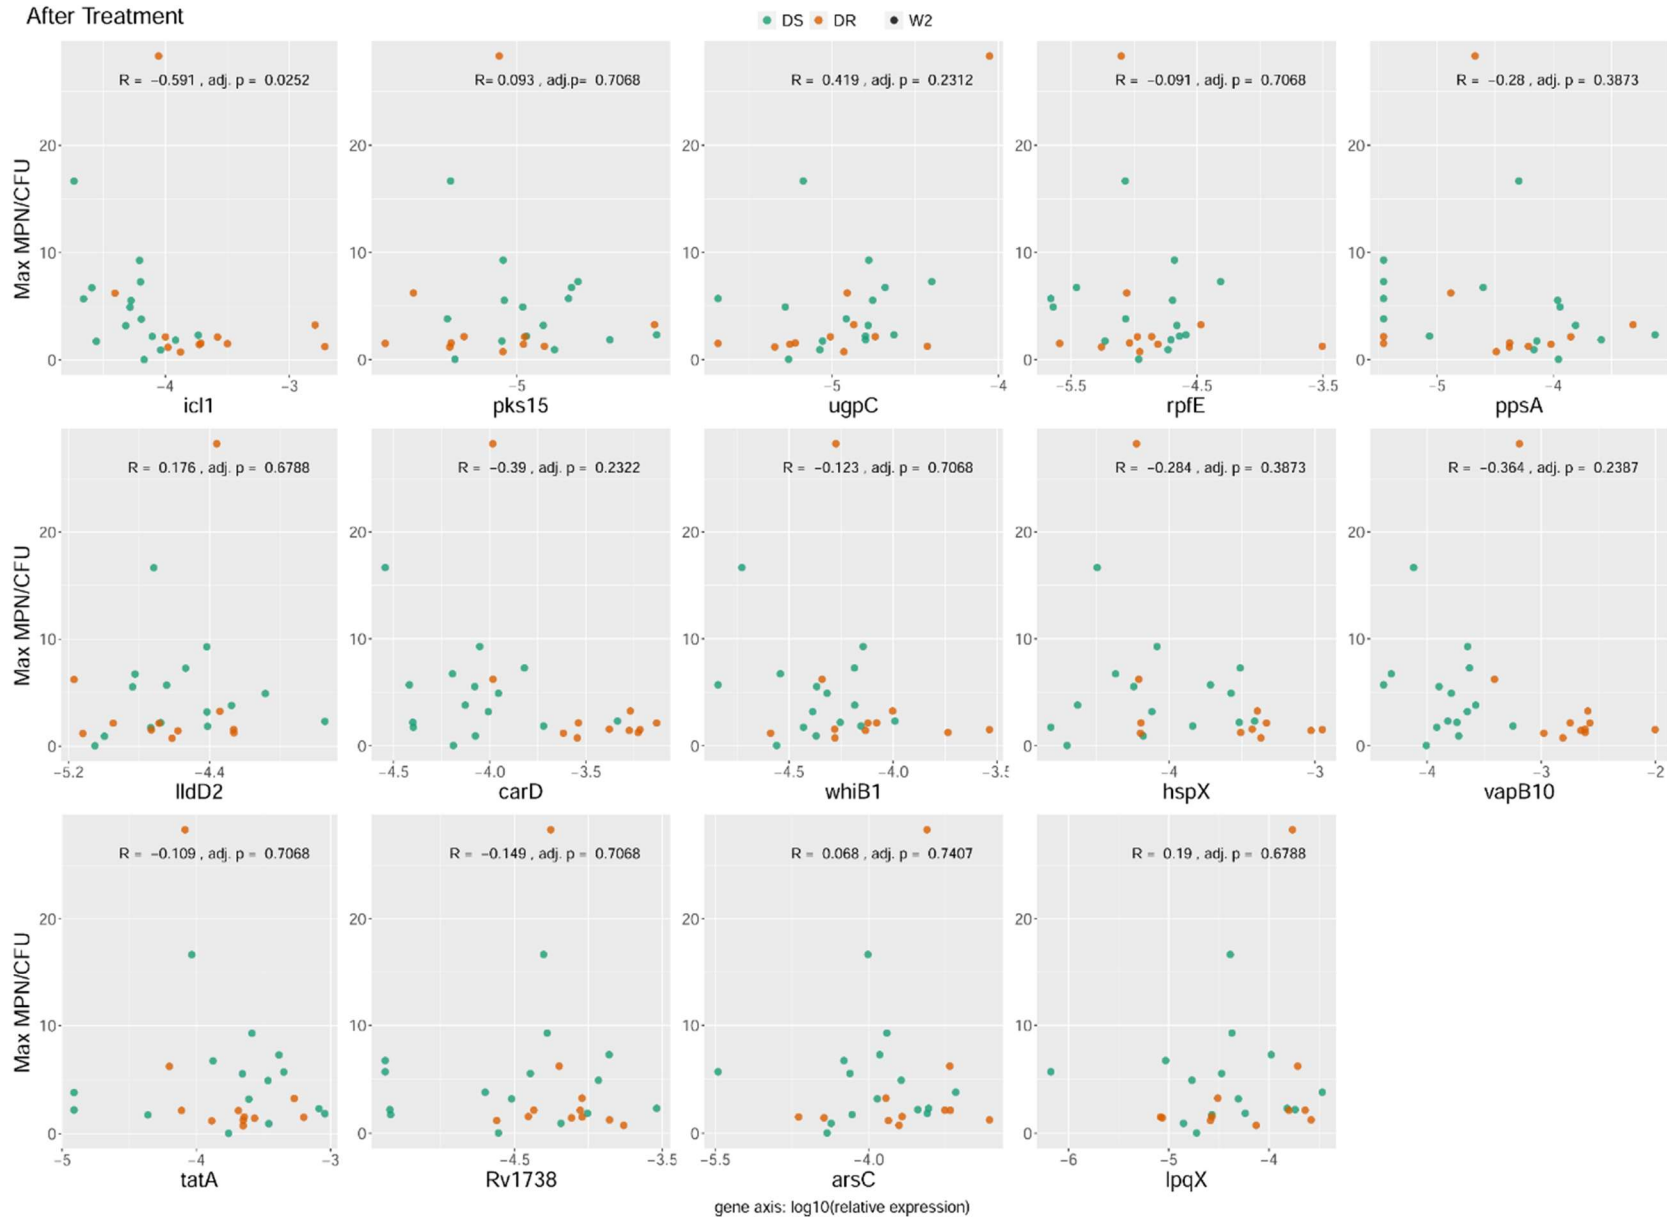

Supplement: mbio.02701-22-s0003.pdf [file mbio.02701-22-s0003.pdf]
