# Supplementary material for: Transcriptional Biomarkers of Differentially Detectable Mycobacterium tuberculosis in Patient Sputum
Source: PubMed Central journal article supplement (PMC9765512; doi:10.1128/mbio.02701-22), 2022-11-03

**B**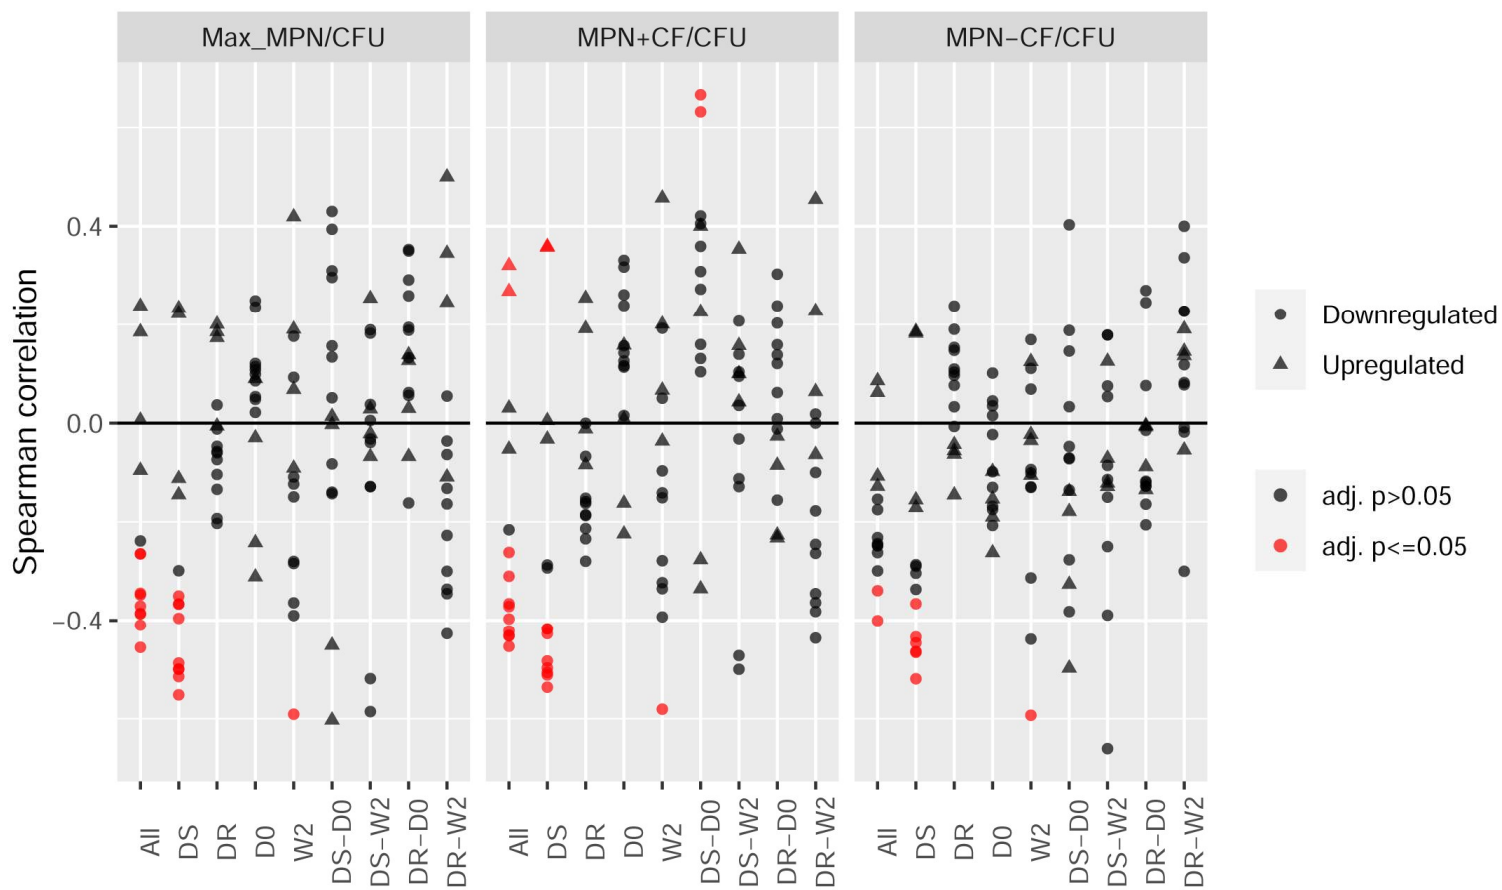

Supplement: mbio.02701-22-s0001.pdf [file mbio.02701-22-s0001.pdf]
