# Supplementary material for: Transcriptional Biomarkers of Differentially Detectable Mycobacterium tuberculosis in Patient Sputum
Source: PubMed Central journal article supplement (PMC9765512; doi:10.1128/mbio.02701-22), 2022-11-03

# Cluster Dendrogram

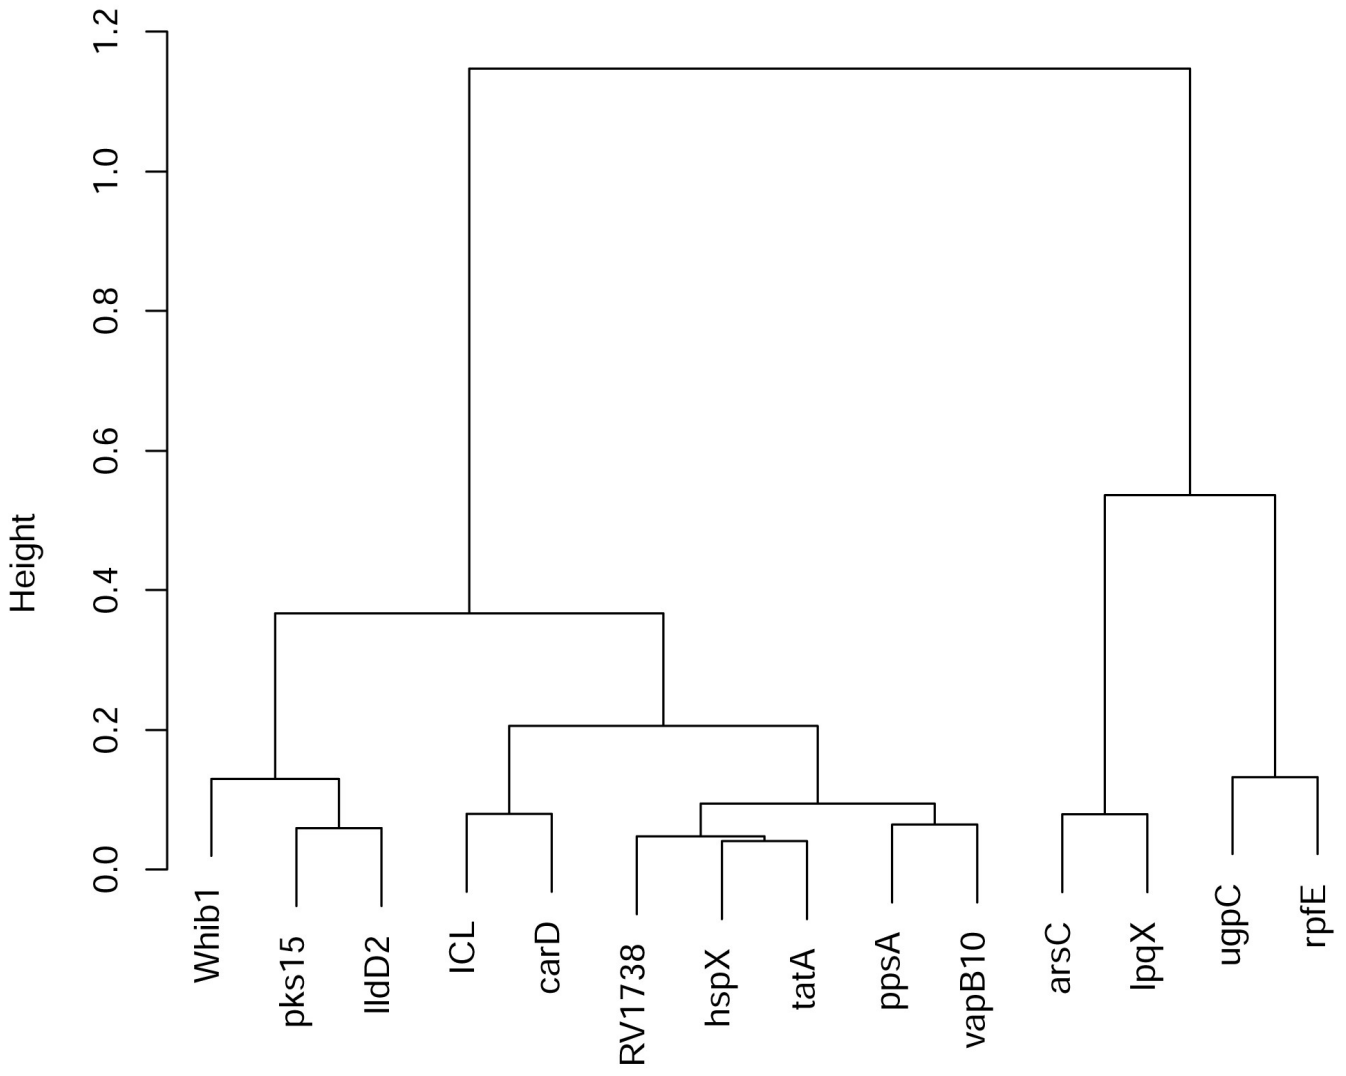

Supplement: mbio.02701-22-s0002.pdf [file mbio.02701-22-s0002.pdf]
